# Supplementary material for: Phenanthroline bridged bis(β-cyclodextrin)s/adamantane-carboxylic acid supramolecular complex as an efficient fluorescence sensor to Zn2+
Source: Royal Society of Chemistry journal article supplement (doi:10.1039/c3qo00054k), 2014-01-01
Supplement: c3qo00054k1.pdf [file c3qo00054k1.pdf]

**Supporting Information for**

**Phenanthroline Bridged Bis( $\beta$ -cyclodextrin)s/Adamantane-carboxylic Acid Supramolecular Complex as an Efficient Fluorescence Sensor to  $Zn^{2+}$**

Yu-Hui Zhang, Ying-Ming Zhang, Yong Chen, Yang Yang, and Yu Liu\*

Department of Chemistry, State Key Laboratory of Elemento-Organic Chemistry,  
Nankai University, Collaborative Innovation Center of Chemical Science and  
Engineering, Tianjin 300071, P. R. China

Address correspondence to [yuliu@nankai.edu.cn](mailto:yuliu@nankai.edu.cn)

## Contents

|                                                                                                        |     |
|--------------------------------------------------------------------------------------------------------|-----|
| <b>Scheme S1.</b> Synthetic route of <b>1</b> .....                                                    | S6  |
| <b>Figure S1-S3.</b> Characterization data of compound <b>1</b> .....                                  | S7  |
| <b>Figure S4-S6.</b> Characterization data of compound <b>2</b> .....                                  | S9  |
| <b>Figure S7.</b> Relative fluorescence change of <b>1</b> with different metal cations.....           | S9  |
| <b>Figure S8.</b> Job's plot of <b>1/AdCA/Zn<sup>2+</sup></b> system .....                             | S10 |
| <b>Figure S9-S10.</b> Binding constant and complex stoichiometry of <b>1/AdCA</b> .....                | S11 |
| <b>Figure S11.</b> Fluorescence emission spectra of <b>1</b> and <b>1/AdCA</b> .....                   | S12 |
| <b>Figure S12.</b> <sup>1</sup> H ROESY spectrum of <b>1</b> .....                                     | S13 |
| <b>Figure S13.</b> <sup>1</sup> H NOESY spectrum of <b>1/Zn<sup>2+</sup></b> complex. ....             | S13 |
| <b>Figure S14.</b> <sup>1</sup> H NOESY spectrum of <b>1/AdCA/Zn<sup>2+</sup></b> complex.....         | S14 |
| <b>Figure S15.</b> Energy minimization structure of <b>1/AdCA/Zn<sup>2+</sup></b> complex.....         | S15 |
| <b>Figure S16.</b> Dependence of observed rate constant $k_{\text{obs}}$ of <b>1/AdCA</b> complex..... | S15 |

## Experimental Section

**Materials.** All chemicals were reagent grade unless noted.  $\beta$ -Cyclodextrin was recrystallized twice from water and dried in vacuo at 90 °C for 24 h before use. Crude *N,N*-dimethylformamide (DMF) was stirred with  $\text{CaH}_2$  for 3 days and then distilled under reduced pressure prior to use. 2,9-Bis(hydroxymethyl)-1,10-phenanthroline<sup>1</sup>, and mono-(6-deoxyl-6-azido)-  $\beta$ -cyclodextrin<sup>2</sup> were prepared according to the reported methods. Column chromatography was performed on 200-300 mesh silica gel.

**Instruments.** Elemental analysis was performed on a Perkin-Elmer-2400C instrument. NMR spectra were recorded on Bruker AV400 instruments. The fluorescent spectra were recorded in a conventional quartz cell (10 × 10 × 45 mm) on a Varian Cary Eclipse equipped with a Varian Cary single-cell peltier accessory to control temperature at 25 °C. Circular dichroism spectra were collected in a conventional quartz cell (10 × 10 × 45 mm) on a MOS-500 spectropolarimeter (Bio-Logic) at 25 °C. Fluorescence stopped-flow kinetics was measured using a Bio-Logic SFM-3000 (Bio-Logic) device equipped with the MOS-500 spectrometer and with a 150 W xenon-mercury lamp as excitation source at 25 °C. Three shots were performed successively for each mixing scenario and an average dynamic curve was obtained. Dynamic data were fitted using the Biokine software (Bio-Logic). The excited wavelength and slits were set as 272 nm and 8 nm, respectively. FC-08 flowing cell was used, and the typical dead time of the stopped flow is approximately 1.0 ms. The confocal fluorescent images were captured with a fluorescence-inverted microscope (Olympus

FV1000S-I × 81).

**Synthesis of 2,9-dipropargyl-1,10-phenanthroline (2).** To 20 mL dry DMF was added 2,9-bis(hydroxymethyl)-1,10-phenanthroline (481 mg, 2 mmol), and the solution was cooled to 0 °C, then NaH (4 mmol, 100 mg) was added into the solution. The mixture was stirred at 0 °C for 0.5 h, and then propargyl bromide (80% w/w solution in toluene, 500  $\mu$ L, 4 mmol) was added. The reaction mixture was stirred for 3 h in an ice bath. Then 20 mg NaH was added to complete the reaction, and the mixture was further stirred for another 12 h at room temperature. The reaction mixture was dried under reduced pressure to remove the solvent. The residue was dissolved in chloroform (100 mL) and washed with water (3 × 50 mL), then the organic phase was dried over MgSO<sub>4</sub>. The solvent was removed under reduced pressure and compound **2** was obtained by column chromatography (silica gel) using dichloromethane/ethyl acetate (5:3 v/v) as the eluent to give pale yellow solid (198.5 mg, 31% yield). <sup>1</sup>H NMR (400 MHz, CDCl<sub>3</sub>, ppm):  $\delta$  = 2.51 (s, 2H, CH $\equiv$ C-), 4.38 (d,  $J$  = 4 Hz, 4H, -CH<sub>2</sub>-), 5.16 (s, 4H, -CH<sub>2</sub>-), 7.79 (s, 2H, H of phenanthroline), 7.89 (d,  $J$  = 12 Hz, 2H, H of phenanthroline), 8.29 (d,  $J$  = 8 Hz, 2H, H of phenanthroline); <sup>13</sup>C NMR (100 MHz, CDCl<sub>3</sub>, ppm):  $\delta$  = 58.5, 73.6, 75.0, 79.5, 121.0, 126.2, 128.1, 136.9, 145.1, 159.0 ppm; HR-MS (ESI), C<sub>20</sub>H<sub>16</sub>N<sub>2</sub>O<sub>2</sub>: [M + Na]<sup>+</sup> m/z: calcd 339.1109, found: 339.1108.

**Cell culture and confocal fluorescent imaging.** Human cervical carcinoma (HeLa) cells were cultured in Dulbecco's modified Eagle's medium (DMEM) supplemented with 10% fetal bovine serum (FBS) and gentamicin (80  $\mu$ g mL<sup>-1</sup>) in 6-well plates (2 × 10<sup>4</sup> cells mL<sup>-1</sup>, 1 mL per well) for 24h. The cells were incubated with 0.1 mM

Zn(ClO<sub>4</sub>)<sub>2</sub> for 0.5 h, and then washed with PBS buffer for three times and further incubated with 50 μM **1** or **1**/AdCA for 3 h at 37 °C, respectively. The cells were washed twice with PBS buffer and then performed confocal fluorescent imaging.

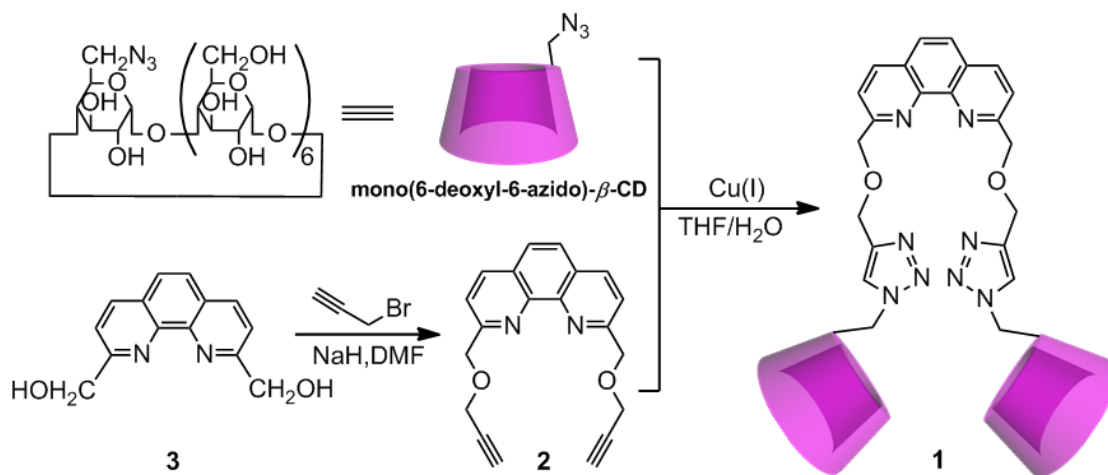

**Scheme S1.** Synthetic route of **1**.

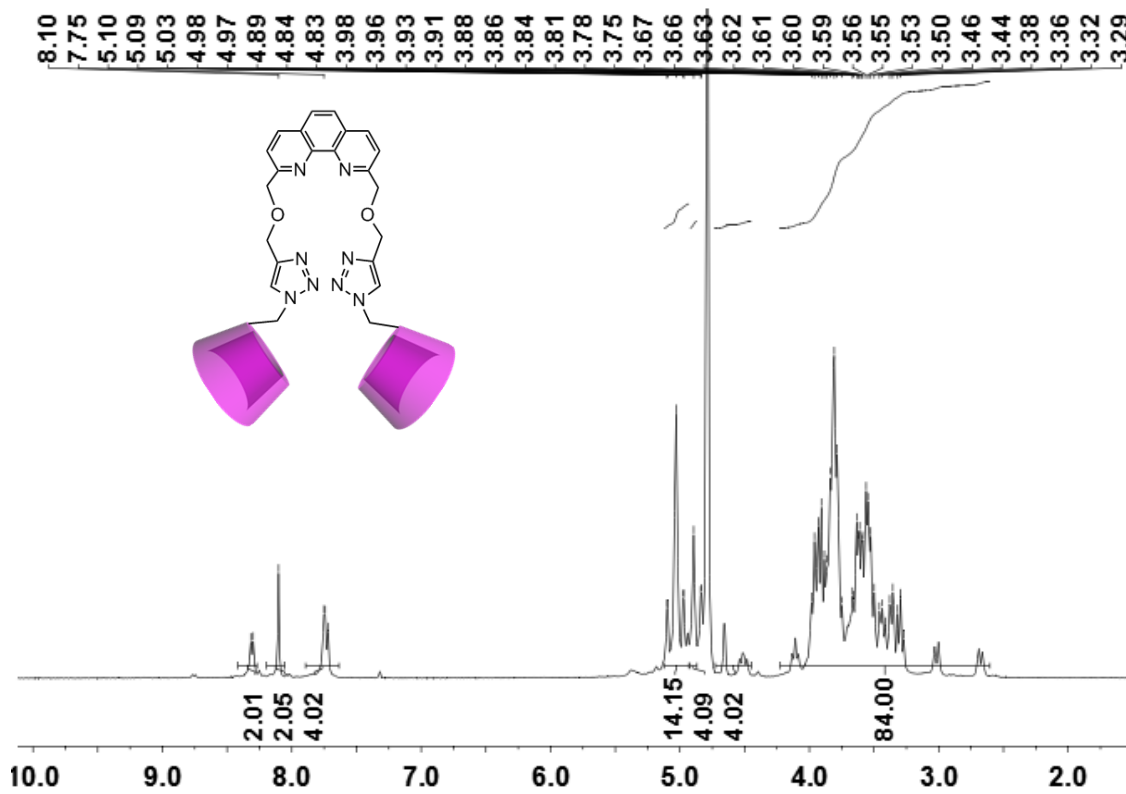

**Figure S1.**  $^1\text{H NMR}$  (400 MHz) spectrum of **1** in  $\text{D}_2\text{O}$  at  $25\text{ }^\circ\text{C}$ .

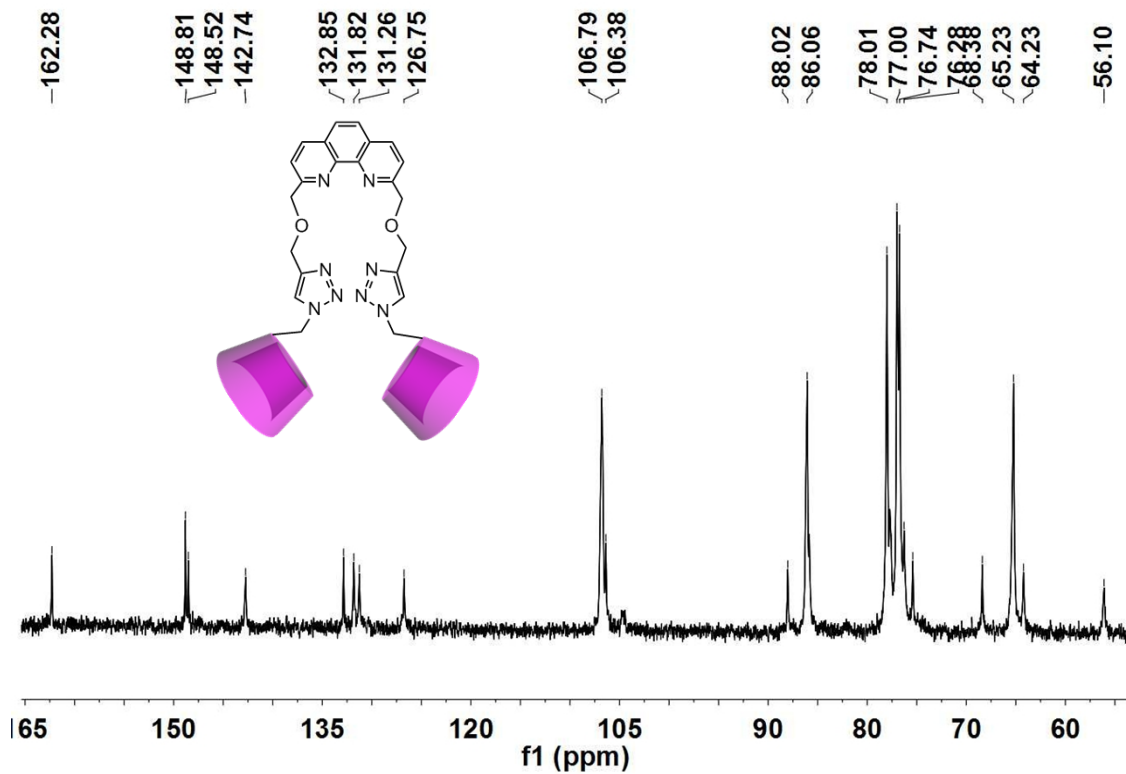

**Figure S2.**  $^{13}\text{C}$  NMR (100 MHz) spectrum of **1** in  $\text{D}_2\text{O}$  at  $25\text{ }^\circ\text{C}$ .

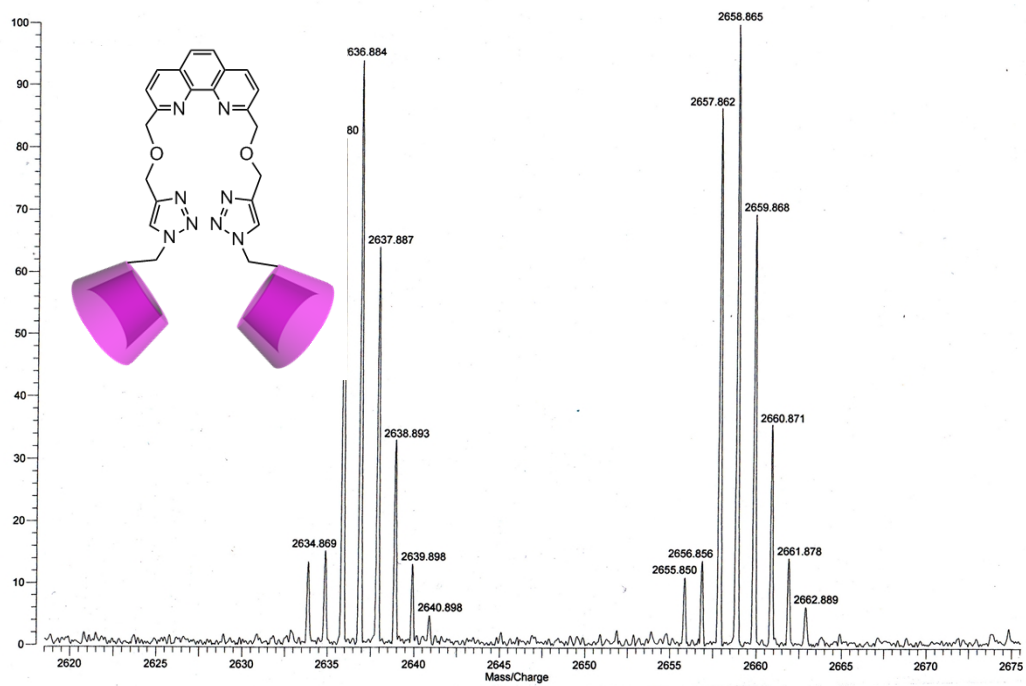

**Figure S3.** MALDI-TOF mass spectrum of **1**.

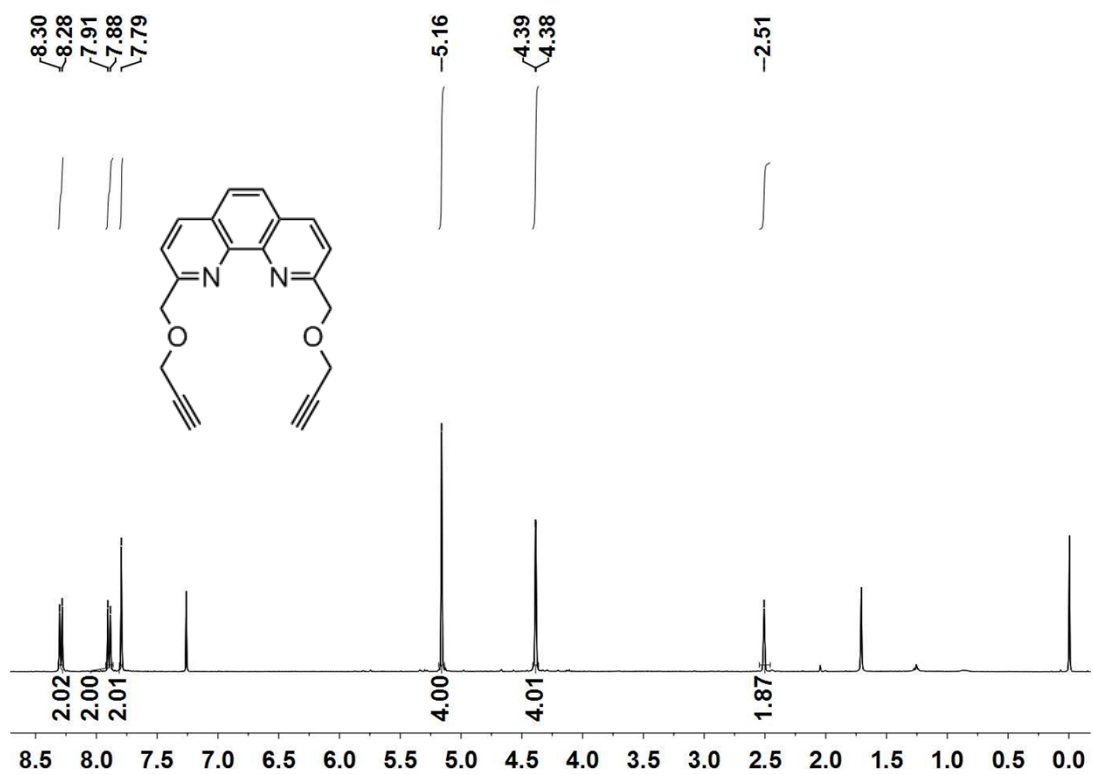

**Figure S4.** <sup>1</sup>H NMR (400 MHz) spectrum of **2** in CDCl<sub>3</sub> at 25 °C.



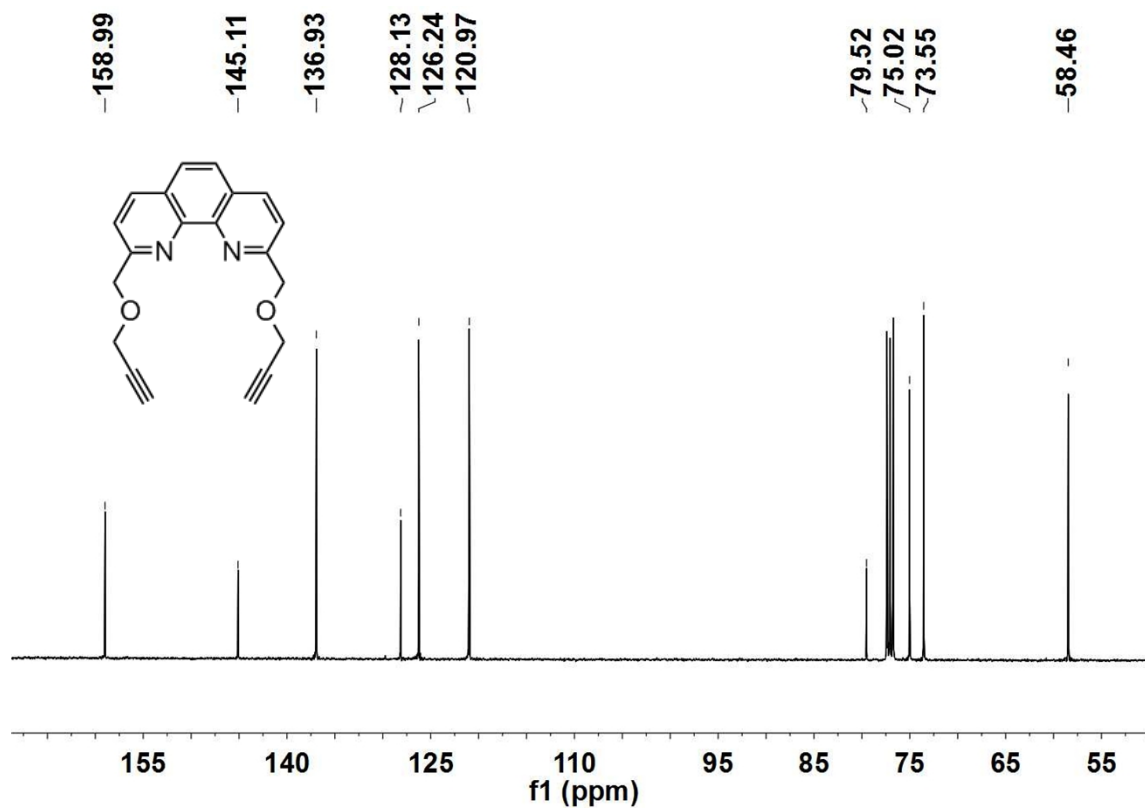

**Figure S5.**  $^{13}\text{C}$  NMR (100 MHz) spectrum of **2** in  $\text{CDCl}_3$  at 25 °C.

Varian QFT-ESI  
File: zyh-in2que\_ESI.trans

Mode: Positive  
Scans: 1  
Date: 12-APR-2013  
Time: 17:18:38  
Scale: 20.0911

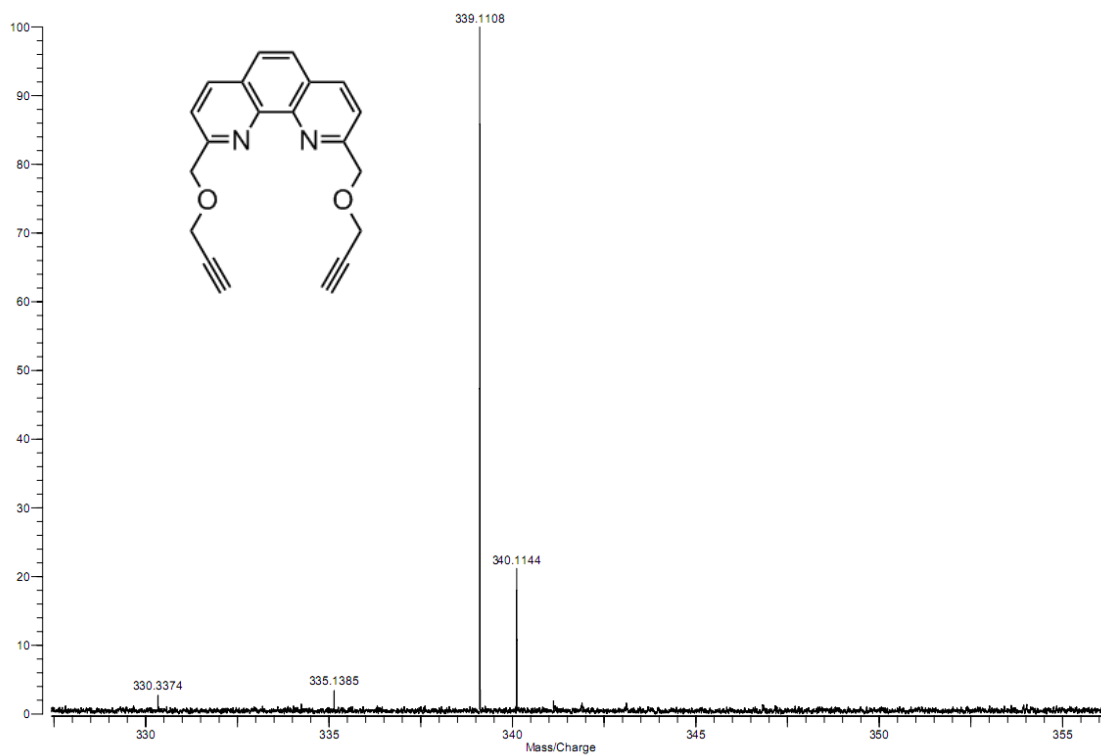

**Figure S6.** High-resolution mass spectrum of **2**.

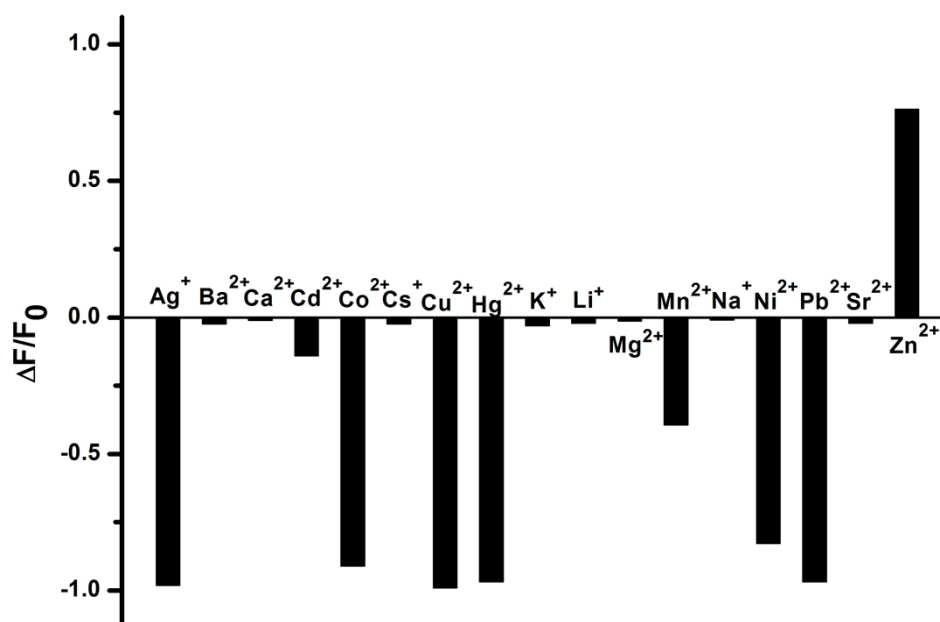

**Figure S7.** Relative fluorescence change ( $\Delta F/F_0$ ) of **1** at 377 nm in the presence of different metal cations in HEPES buffer (10 mM, pH = 7.2, [**1**] =  $1.5 \times 10^{-5}$  M, [AdCA] =  $1.0 \times 10^{-3}$  M, [ $M^{n+}$ ] =  $3.0 \times 10^{-5}$  M,  $\lambda_{\text{ex}}$  = 272 nm).

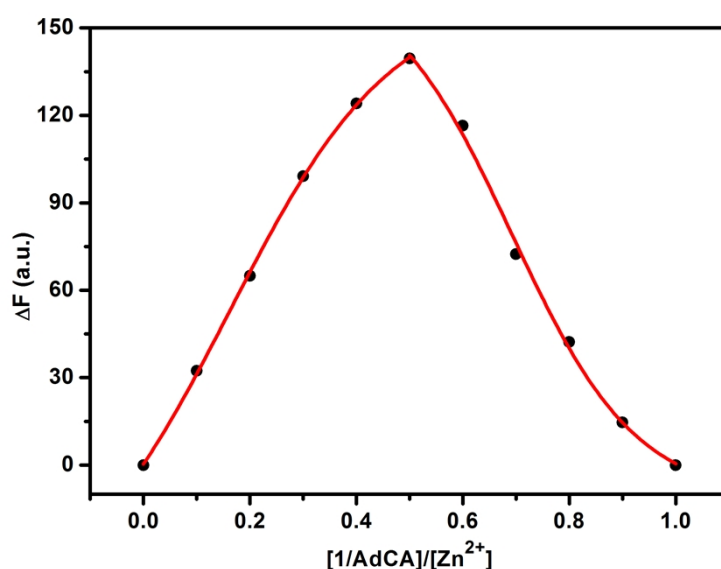

**Figure S8.** Job's plot of **1**/AdCA/ $Zn^{2+}$  system in HEPES buffer solution (10 mM, pH = 7.2) at 25 °C ([**1**] + [ $Zn^{2+}$ ] =  $2.0 \times 10^{-5}$  M).

### Determination of complex stoichiometry and binding constant of 1/AdCA system:<sup>3</sup>

In our case, the fluorescence intensity  $F$  and other binding parameters obey Hill plot:

$$\log\left(\frac{F - F_{\min}}{F_{\max} - F}\right) = n \log[M] + B \quad (B = \log\beta)$$

where  $F$  is the fluorescence intensity of **1** in the presence of a certain concentration of AdCA;  $F_{\max}$  is the fluorescence intensity of **1** when the titration reaches equilibrium;  $F_{\min}$  is the fluorescence intensity of **1** without addition of AdCA; and  $n$  is the binding stoichiometry of **1** with AdCA; and  $\beta$  is the binding constant of **1** with AdCA.

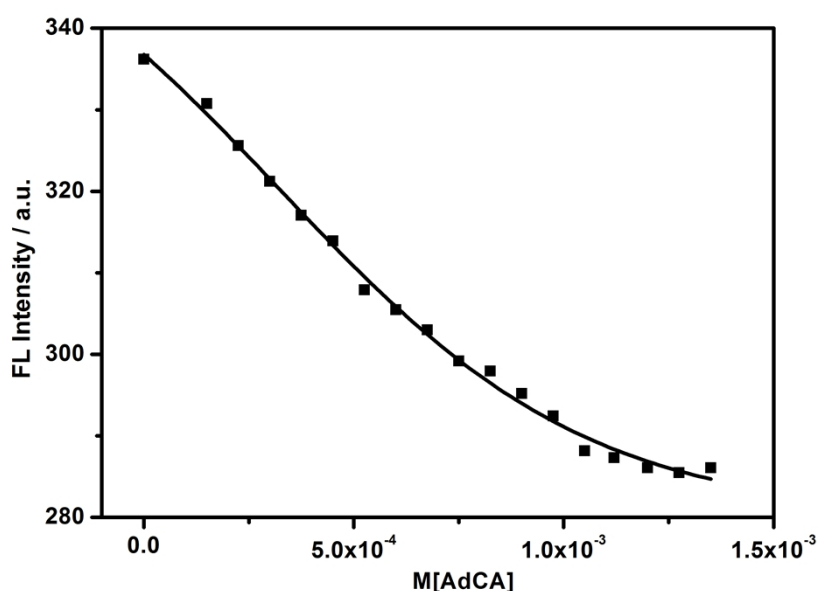

**Figure S9.** Fluorescence intensity changes of **1** upon addition of AdCA in HEPES buffer solution (10 mM, pH = 7.2) at 25 °C ( $[1] = 1.5 \times 10^{-5}$  M,  $\lambda_{\text{ex}} = 272$  nm, and  $\lambda_{\text{em}} = 368$  nm).

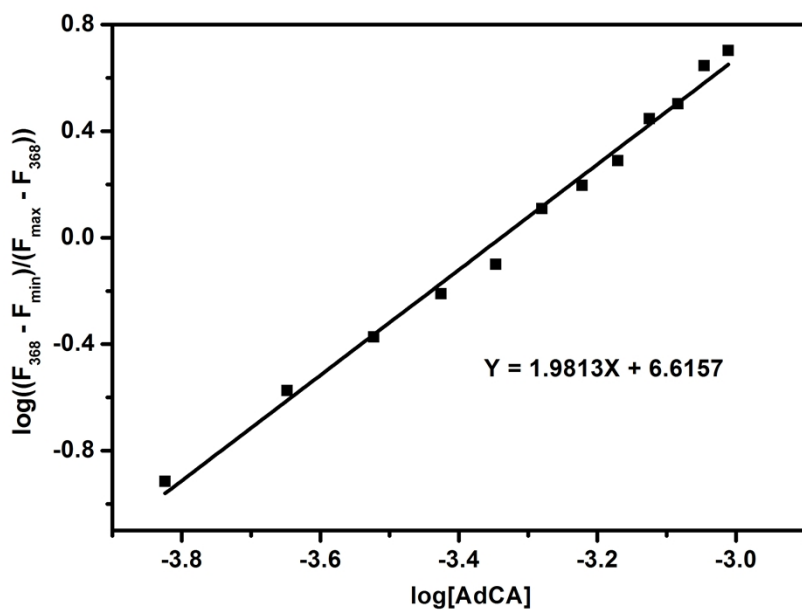

**Figure S10.** Linear fitting of  $\log((F_{368} - F_{\min})/(F_{\max} - F_{368}))$  versus  $\log[\text{AdCA}]$  ( $[1] = 1.5 \times 10^{-5} \text{ M}$ ,  $F_{\max} = 286$ , and  $F_{\min} = 336$ ). From the slope ( $n = 1.98$ ) and intercept ( $\log\beta = 6.62$ ), it can be seen that the binding stoichiometry and  $\log K_S$  value between **1** and AdCA are 2 and  $4.2 \times 10^6 \text{ M}^{-2}$ , respectively.

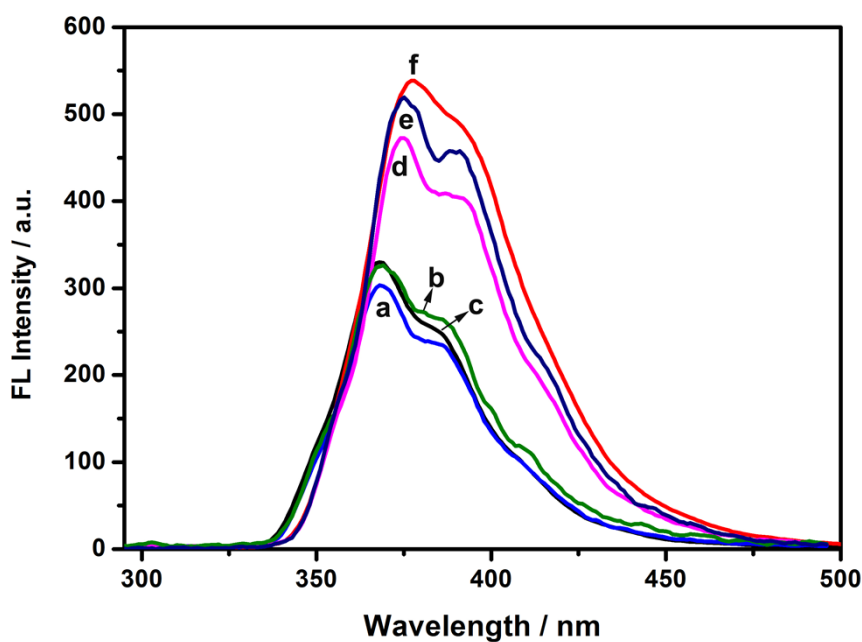

**Figure S11.** Fluorescence emission spectra of (a) **1**/AdCA complex with 90%

encapsulation ratio ( $[\text{AdCA}] = 1 \times 10^{-3} \text{ M}$ ), (b) **1**/AdCA complex with 50% encapsulation ratio ( $[\text{AdCA}] = 4 \times 10^{-5} \text{ M}$ ), (c) free **1**, (d) **1**/AdCA complex in (a) with  $\text{Zn}^{2+}$ , (e) **1**/AdCA complex in (b) with  $\text{Zn}^{2+}$ , and (f) **1**/ $\text{Zn}^{2+}$  complex in HEPES buffer solution at 25 °C ( $[\text{1}] = 1.5 \times 10^{-5} \text{ M}$ ,  $[\text{Zn}^{2+}] = 3 \times 10^{-5} \text{ M}$ ,  $\lambda_{\text{ex}} = 272 \text{ nm}$ , and  $\lambda_{\text{em}} = 377 \text{ nm}$ ).

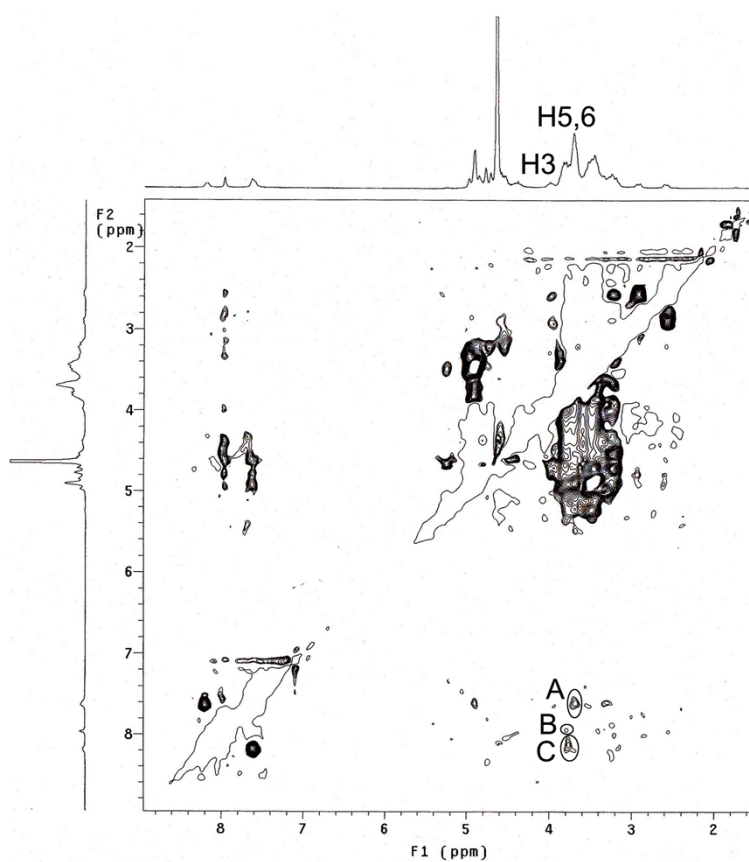

**Figure S12.** ROESY spectrum of **1** in  $\text{D}_2\text{O}$  at 25 °C. ( $[\text{1}] = 5 \times 10^{-3} \text{ M}$ ).

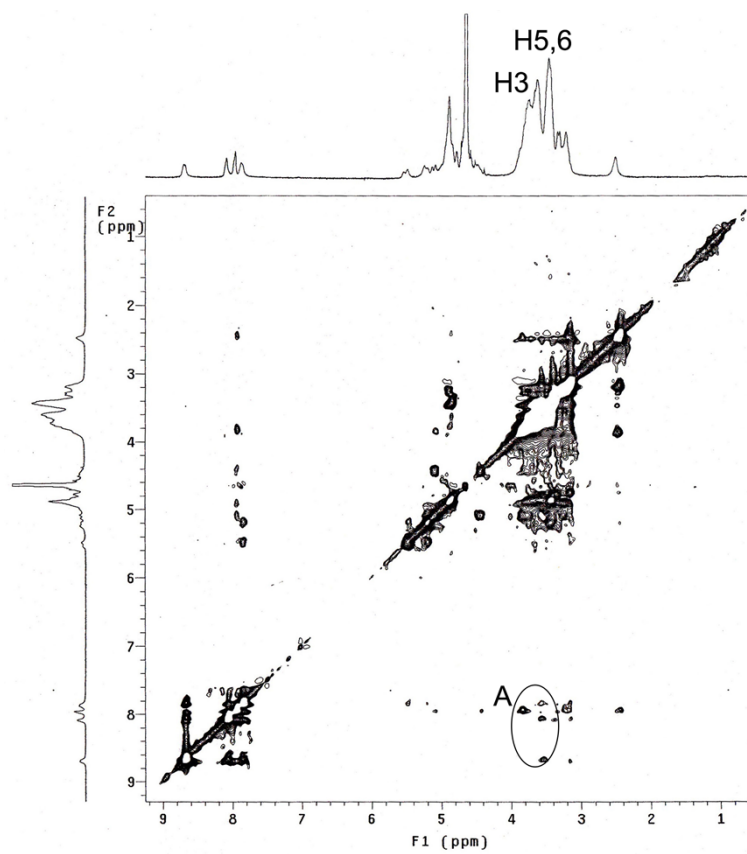

**Figure S13.** NOESY spectrum of **1**/ $\text{Zn}^{2+}$  system in  $\text{D}_2\text{O}$  at 25 °C.  $[\mathbf{1}] = 2.5 \times 10^{-3}$  M,  $[\text{Zn}^{2+}] = 5.0 \times 10^{-3}$  M).

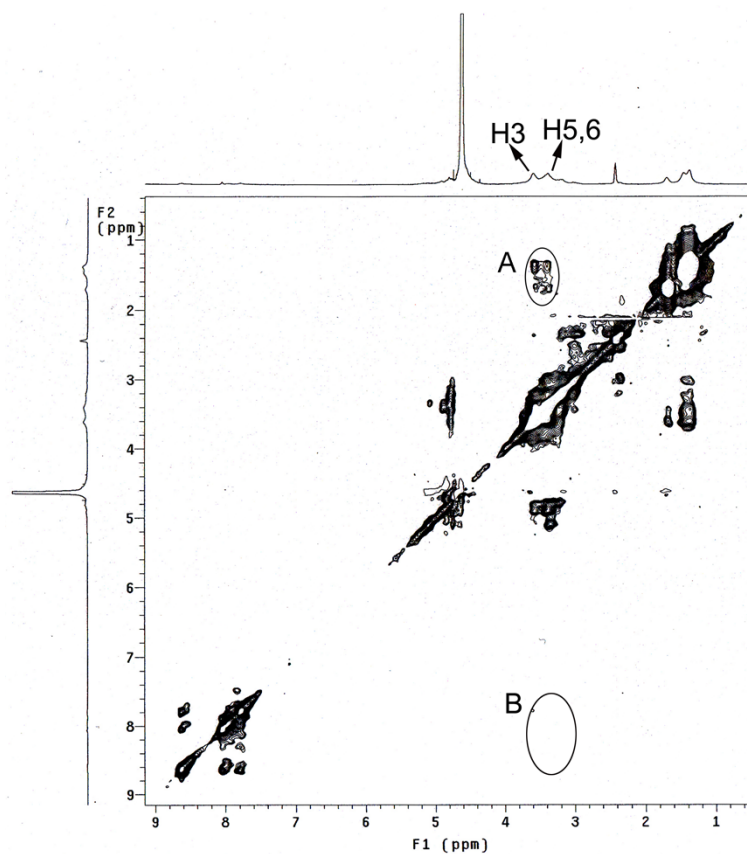

**Figure S14.** NOESY spectrum of **1**/AdCA/Zn<sup>2+</sup> system in D<sub>2</sub>O at 25 °C. ([**1**] = 2.5 × 10<sup>-3</sup> M, [AdCA] = 7.4 × 10<sup>-3</sup> M, [Zn<sup>2+</sup>] = 5.0 × 10<sup>-3</sup> M. Under this concentration, more than 99% of **1** and AdCA were converted to **1**/AdCA complex through a calculation based on the binding constant between CD and AdCA).

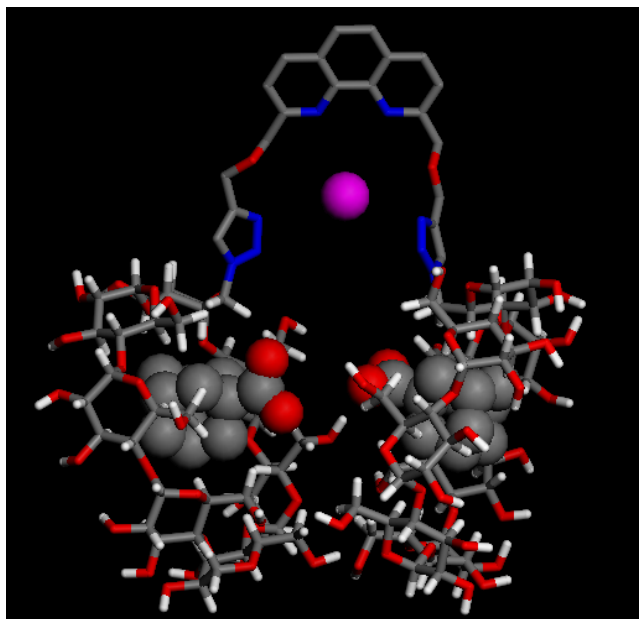

**Figure S15.** Energy minimization structure of 1/AdCA/Zn<sup>2+</sup> system obtained by molecular modeling study. The geometry of 1/AdCA/Zn<sup>2+</sup> complex was optimized by the molecular mechanics method with dreiding forcefield.

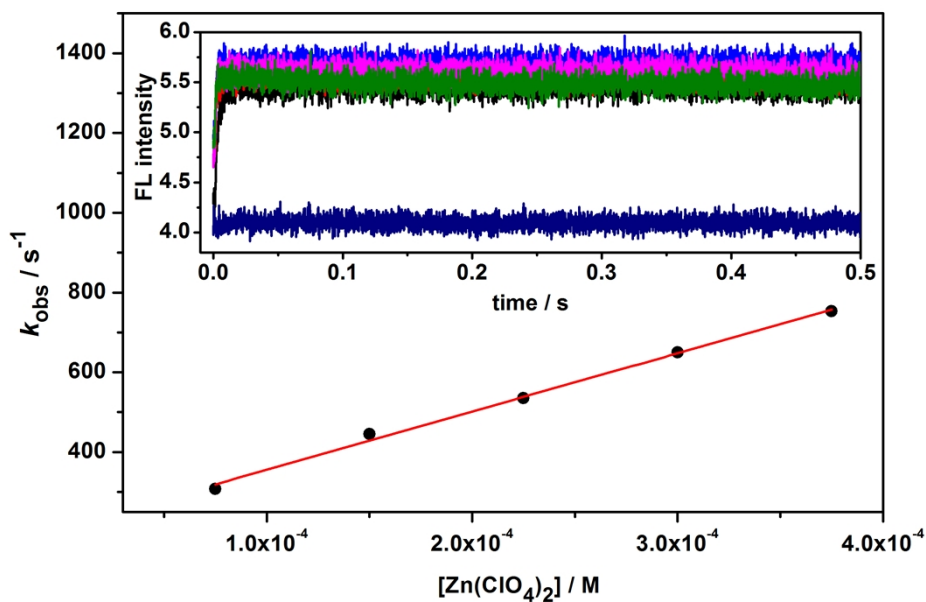

**Figure S16.** Dependence of observed rate constant  $k_{\text{obs}}$  of 1/AdCA ( $[1] = 1.5 \times 10^{-5}$  M,  $[\text{AdCA}] = 2 \times 10^{-3}$  M) with different concentrations of Zn<sup>2+</sup> in HEPES buffer solution



(10 mM, pH = 7.2). Inset: Dynamic experiments of the rapid mixing of 1/AdCA with different concentrations of Zn(ClO<sub>4</sub>)<sub>2</sub> (0, 0.75, 1.5, 2.25, 3.0, and 3.75 × 10<sup>-4</sup> M). All concentrations mentioned above are the final ones after mixing.

## References

---

1. T. Higashi, K. Inami and M. Mochizuki, *J. Heterocycl. Chem.*, 2008, **45**, 1889-1892.
2. C. Hocquelet, J. Blu, C. K. Jankowski, S. Arseneau, D. Buisson and L. Mauclaire, *Tetrahedron* 2006, **62**, 11963-11971.
3. X.-L. Tang, X.-H. Peng, W. Dou, J. Mao, J.-R. Zheng, W.-W. Qin, W.-S. Liu, J. Chang and X.-J. Yao, *Org. Lett.*, 2008, **10**, 3653-3656.
